# Supplementary material for: β-NiS 3D micro-flower-based electrode for aqueous asymmetric supercapacitors
Source: Royal Society of Chemistry journal article supplement (doi:10.1039/d0se00780c), 2020-01-01
Supplement: d0se00780c1.pdf [file d0se00780c1.pdf]

# **$\beta$ -NiS 3D micro-flower-based electrode for aqueous asymmetric supercapacitors**

Jai Bhagwan<sup>a</sup>, Sk. Khaja Hussain,<sup>a,b</sup> B. N. Vamsi Krishna,<sup>a</sup> and Jae Su Yu<sup>a\*</sup>

*<sup>a</sup>Department of Electronic Engineering, Institute for Wearable Convergence Electronics, Kyung Hee University, 1 Seocheon-dong, Giheung-gu, Yongin-si, Gyeonggi-do 446-701, Republic of Korea.*

*<sup>b</sup>Department of Chemical Engineering, College of Engineering, Kyung Hee University, 1732, Deogyong-daero, Gihung-gu, Yongin-si, Gyeonggi-do 17104, Republic of Korea.*

\*Address correspondence to [jsyu@khu.ac.kr](mailto:jsyu@khu.ac.kr)

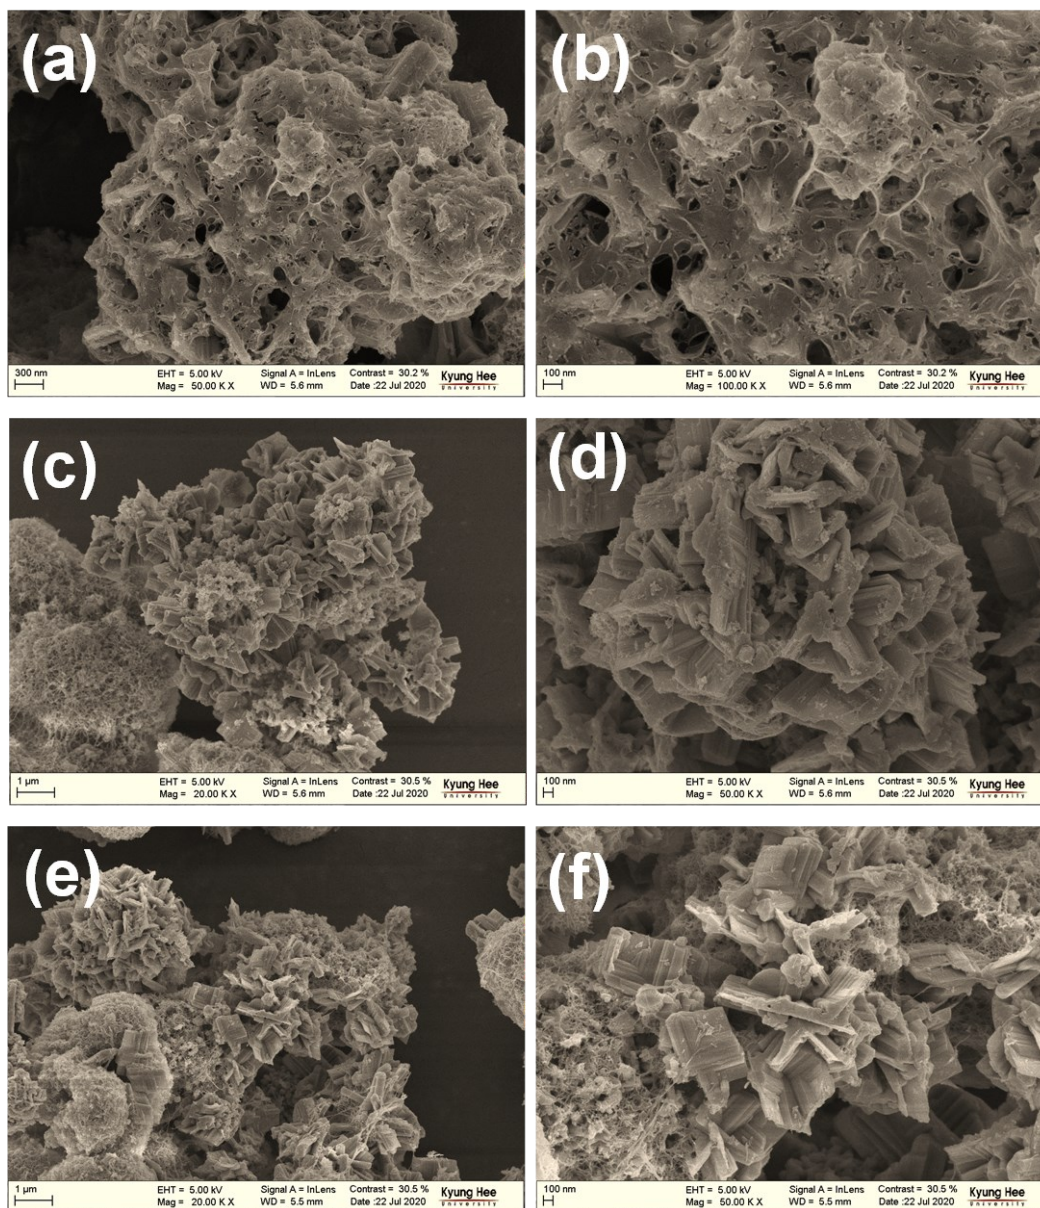

**Figure S1.**  $\beta$ -NiS products prepared at fixed reaction time (12 h) and various temperature conditions such as (a) & (b) 150 °C, (c) & (d) 160 °C and (e) & (f) 180 °C.

The comparative cyclic voltammetry (CV) curves of pristine Ni foam and NiS@Ni were measured at the  $10 \text{ mV s}^{-1}$  as displayed in Figure. S2. It could be noted that the current response of Ni foam is too less as compared to NiS@Ni. So, the contribution of Ni substrate in capacitance could be discarded as compared to the values obtained from NiS@Ni.

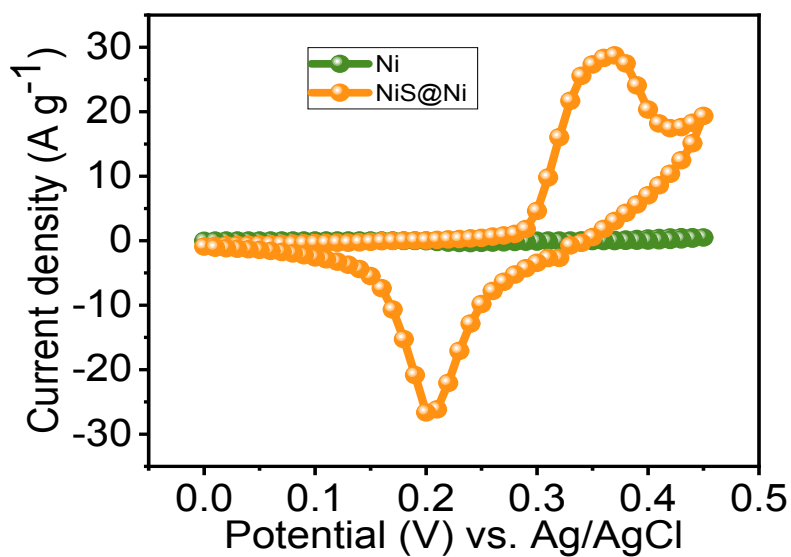

**Figure S2.** CV comparison of NiS@Ni with Ni foam at the scan rate of  $10 \text{ mV s}^{-1}$ .
